# Supplementary material for: Preparation of magnetic metal organic framework nanocomposites for efficient and selective adsorption of hemoglobin from bovine blood
Source: Royal Society of Chemistry journal article supplement (doi:10.1039/c7ra04397j), 2017-01-01
Supplement: c7ra04397j1.pdf [file c7ra04397j1.pdf]

## Electronic Supplementary Information

### **Preparation of magnetic metal organic framework nanocomposites for efficient and selective adsorption of hemoglobin from bovine blood**

Xin Yao, Xiangdong Ma, Xiaomei Gao and Li Jia\*

*Ministry of Education Key Laboratory of Laser Life Science & Institute of Laser Life  
Science, College of Biophotonics, South China Normal University, Guangzhou  
510631, China*

\* To whom correspondence should be addressed.

Tel: +86-20-85211543

Fax: +86-20-85216052

Email: [jjiali@scnu.edu.cn](mailto:jjiali@scnu.edu.cn)

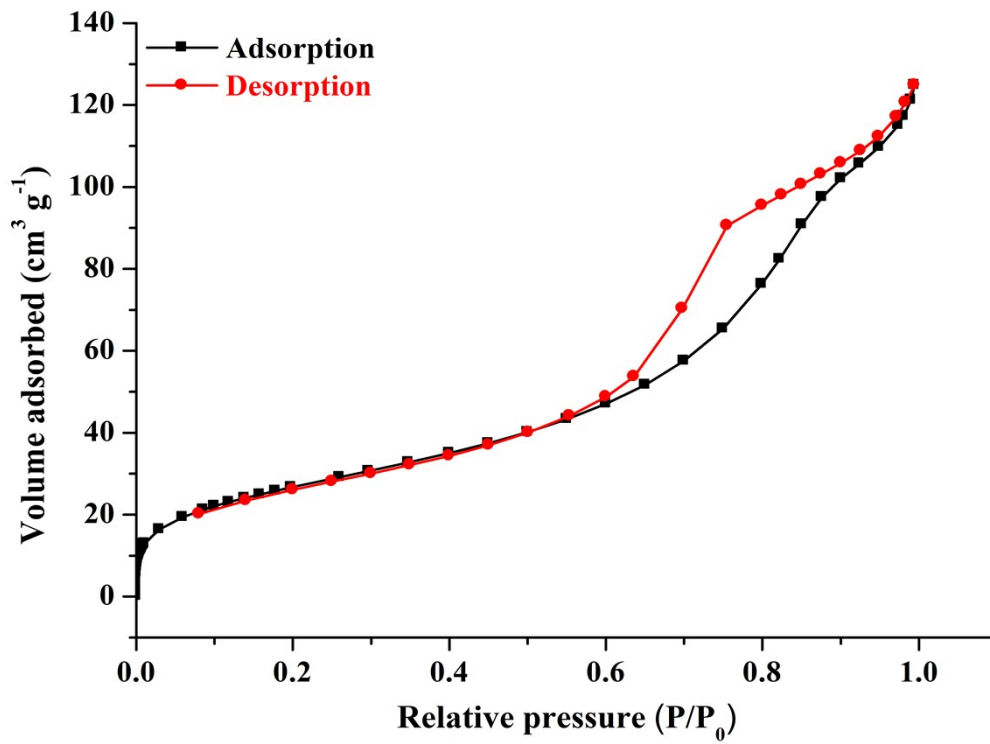

**Fig. S1** N<sub>2</sub> adsorption-desorption isotherms of Fe<sub>3</sub>O<sub>4</sub>-COOH particles measured at 77

k.

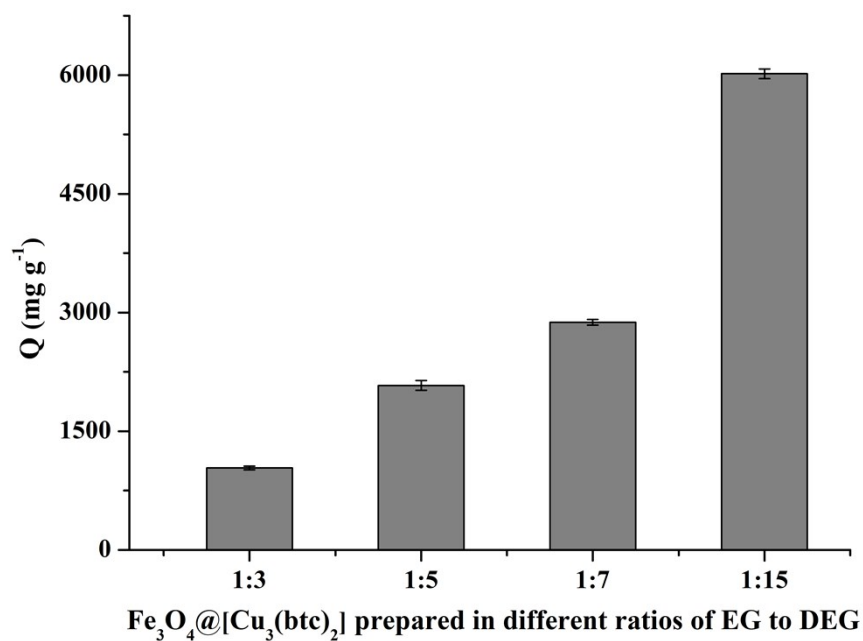

**Fig. S2** Effect of size of Fe<sub>3</sub>O<sub>4</sub>@[Cu<sub>3</sub>(btc)<sub>2</sub>] on BHB adsorption (n=3). Experimental conditions: adsorption solution, 20 mM PBS (pH 7.0); concentration of BHB, 1.8 mg mL<sup>-1</sup>; volume, 0.2 mL; Fe<sub>3</sub>O<sub>4</sub>@[Cu<sub>3</sub>(btc)<sub>2</sub>] particles: 0.03 mg; incubation time 90 min.
